# Supplementary material for: Impact of Sex and Genetic Variation in Relevant Pharmacogenes on the Pharmacokinetics and Safety of Valsartan, Olmesartan and Hydrochlorothiazide
Source: MDPI journal article supplement (doi:10.3390/ijms242015265), 2023-10-17
Supplement: s1 [file s1]

# **Impact of sex and genetic variation in relevant pharmacogenes on the pharmacokinetics and safety of valsartan, olmesartan and hydrochlorothiazide**

Paula Soria-Chacartegui <sup>1</sup>, Pablo Zubiaur <sup>1,\*</sup>, Dolores Ochoa <sup>1</sup>, Marcos Navares-Gómez <sup>1</sup>, Gonzalo Villapalos-García <sup>1</sup>, Alejandro de Miguel <sup>1</sup>, Eva González-Iglesias <sup>1</sup>, Andrea Rodríguez-López <sup>1</sup>, Gina Mejía-Abril <sup>1</sup>, Samuel Martín-Vilchez <sup>1</sup>, Sergio Luquero-Bueno <sup>1</sup>, Manuel Román <sup>1</sup> and Francisco Abad-Santos <sup>1,2\*</sup>.

<sup>1</sup> Clinical Pharmacology Department, Hospital Universitario de La Princesa, Faculty of Medicine, Universidad Autónoma de Madrid (UAM), Instituto de Investigación Sanitaria La Princesa (IP), 28006 Madrid, Spain.

<sup>2</sup> Centro de Investigación Biomédica en Red de Enfermedades Hepáticas y Digestivas (CIBERehd), Instituto de Salud Carlos III, 28029 Madrid, Spain.

\* Correspondence: pablo.zubiaur@uam.es (P.Z.), francisco.abad@uam.es (F.A.-S.).

## SUPPLEMENTARY MATERIAL

**Table S1.** Hydrochlorothiazide pharmacokinetics regarding biogeographic origin, CT, genotypes and phenotypes.

| Variable                    | n  | AUC <sub>∞</sub> /DW<br>(ng*h*kg/ml*mg) | C <sub>max</sub> /DW<br>(ng*kg/ml*mg) | t <sub>max</sub> (h) | t <sub>1/2</sub> (h) |
|-----------------------------|----|-----------------------------------------|---------------------------------------|----------------------|----------------------|
| <b>Biogeographic origin</b> |    |                                         |                                       |                      |                      |
| European                    | 37 | 3291.69 (709.97)                        | 483.85 (111.12)                       | 1.94 (0.70)          | 9.29 (1.55)          |
| Other <sup>#</sup>          | 21 | 3398.60 (800.55)                        | 461.39 (100.10)                       | 1.98 (0.73)          | 9.28 (1.25)          |
| <b>CT</b>                   |    |                                         |                                       |                      |                      |
| 2                           | 4  | 3451.89 (372.63)                        | 458.25 (51.09)                        | 1.69 (0.38)          | 9.17 (1.64)          |
| 3                           | 8  | 3002.88 (489.14)                        | 424.38 (64.28)                        | 2.16 (0.83)          | 9.21 (1.47)          |
| 4                           | 8  | 2996.97 (206.41)                        | 435.41 (85.73)                        | 1.75 (0.87)          | 9.80 (1.21)          |
| 5                           | 12 | 3658.72 (1122.00)                       | 495.78 (121.43)                       | 1.91 (0.78)          | 9.23 (1.12)          |
| 6                           | 10 | 3704.02 (685.72)                        | 562.78 (99.50)                        | 2.18 (0.78)          | 9.35 (1.78)          |
| 7                           | 16 | 3150.75 (612.93)                        | 456.44 (112.63)                       | 1.91 (0.53)          | 9.09 (1.61)          |
| <b>ABCB1 rs1128503</b>      |    |                                         |                                       |                      |                      |
| T/T                         | 15 | 3459.35 (1073.41)                       | 481.41 (132.28)                       | 2.10 (0.82)          | 9.15 (1.25)          |
| C/T                         | 21 | 3092.55 (450.55)                        | 458.09 (97.68)                        | 1.83 (0.44)          | 9.32 (1.58)          |
| C/C                         | 21 | 3485.00 (669.04)                        | 494.09 (97.85)                        | 1.89 (0.75)          | 9.40 (1.49)          |
| <b>ABCB1 rs1045642</b>      |    |                                         |                                       |                      |                      |
| T/T                         | 17 | 3307.74 (710.69)                        | 452.87 (112.99)                       | 2.09 (0.66)          | 9.29 (1.17)          |
| C/T                         | 21 | 3266.86 (917.42)                        | 487.91 (109.53)                       | 1.85 (0.64)          | 9.27 (1.63)          |
| C/C                         | 19 | 3430.70 (571.69)                        | 488.01 (100.65)                       | 1.85 (0.72)          | 9.36 (1.51)          |
| <b>ABCB1 rs2032582</b>      |    |                                         |                                       |                      |                      |
| T/T                         | 13 | 3194.44 (609.62)                        | 445.81 (118.26)                       | 1.98 (0.69)          | 9.58 (1.11)          |
| T/G                         | 20 | 3130.42 (847.09)                        | 466.28 (113.20)                       | 1.99 (0.72)          | 8.87 (1.64)          |
| G/A+G/G+A/A                 | 23 | 3540.31 (652.77)                        | 495.42 (97.62)                        | 1.88 (0.71)          | 9.56 (1.40)          |
| <b>ABCC2 rs2273697</b>      |    |                                         |                                       |                      |                      |
| G/G                         | 39 | 3370.66 (798.61)                        | 482.11 (107.84)                       | 1.95 (0.72)          | 9.33 (1.49)          |
| G/G + G/A                   | 17 | 3267.71 (643.01)                        | 468.19 (110.84)                       | 1.82 (0.57)          | 9.38 (1.30)          |
| <b>ABCG2 rs2231142</b>      |    |                                         |                                       |                      |                      |
| NM                          | 41 | 3350.88 (750.94)                        | 483.59 (104.88)                       | 1.94 (0.72)          | 9.31 (1.57)          |
| IM                          | 16 | 3289.55 (751.97)                        | 461.87 (114.27)                       | 1.86 (0.52)          | 9.29 (1.11)          |
| <b>SLC22A1 rs72552763</b>   |    |                                         |                                       |                      |                      |
| GAT/GAT                     | 37 | 3273.51 (776.85)                        | 475.59 (105.66)                       | 1.95 (0.72)          | 9.13 (1.57)          |
| GAT/- + -/-                 | 20 | 3444.95 (687.26)                        | 481.01 (112.15)                       | 1.87 (0.59)          | 9.63 (1.12)          |
| <b>SLC22A1 rs12208357</b>   |    |                                         |                                       |                      |                      |
| C/C                         | 53 | 3368.79 (756.78)                        | 478.11 (107.96)                       | 1.94 (0.67)          | 9.31 (1.45)          |
| C/T                         | 4  | 2868.32 (350.79)                        | 469.28 (107.87)                       | 1.63 (0.66)          | 9.27 (1.53)          |
| <b>SLCO1B1</b>              |    |                                         |                                       |                      |                      |
| NF                          | 45 | 3340.78 (803.52)                        | 476.21 (110.95)                       | 1.95 (0.68)          | 9.36 (1.39)          |
| DF                          | 10 | 3264.89 (518.28)                        | 499.91 (86.98)                        | 1.71 (0.68)          | 8.80 (1.69)          |
| PF                          | 2  | 3517.53 (371.95)                        | 394.22 (112.23)                       | 2.38 (0.18)          | 10.56 (0.22)         |
| <b>Total</b>                | 58 | 3330.40 (738.86)                        | 475.72 (106.92)                       | 1.95 (0.71)          | 9.28 (1.44)          |

Data shown as mean (standard deviation). AUC<sub>∞</sub>/DW: dose-weight corrected area under the curve. C<sub>max</sub>/DW: dose-weight corrected maximum plasmatic concentration. t<sub>1/2</sub>: half-life. CT:

clinical trial. NM: normal metabolizer. IM: intermediate metabolizer. NF: normal function. DF: decreased function. PF: poor function. #: individuals who self-reported as Latin-American or African.

**Table S2.** Valsartan pharmacokinetics regarding biogeographic origin, CT, genotypes and phenotypes.

| Variable                      | n  | AUC <sub>∞</sub> /DW<br>(ng*h*kg/ml*mg) | C <sub>max</sub> /DW<br>(ng*kg/ml*mg) | t <sub>max</sub> (h) | t <sub>1/2</sub> (h) |
|-------------------------------|----|-----------------------------------------|---------------------------------------|----------------------|----------------------|
| <b>Biogeographic origin</b>   |    |                                         |                                       |                      |                      |
| European                      | 17 | 11158.19 (4757.05)                      | 1339.48 (465.41)                      | 3.29 (0.93)          | 9.19 (2.30)          |
| Other <sup>#</sup>            | 9  | 11367.40 (4038.32)                      | 1463.42 (469.89)                      | 3.92 (0.79)          | 7.80 (2.03)          |
| <b>CT</b>                     |    |                                         |                                       |                      |                      |
| 1                             | 6  | 8676.62 (3053.33)                       | 1115.52 (367.98)                      | 2.98 (0.63)          | 9.67 (3.33)          |
| 2                             | 4  | 9598.88 (3000.41)                       | 1241.25 (507.48)                      | 3.47 (1.25)          | 8.43 (2.17)          |
| 3                             | 8  | 13923.70 (5281.20)                      | 1676.89 (418.49)                      | 3.55 (0.92)          | 8.25 (2.12)          |
| 4                             | 8  | 11268.88 (4072.81)                      | 1358.60 (453.79)                      | 3.88 (0.92)          | 8.58 (1.68)          |
| <b>ABCC2 rs2273697</b>        |    |                                         |                                       |                      |                      |
| G/G                           | 15 | 11729.36 (4400.82)                      | 1485.70 (487.09)                      | 3.50 (0.89)          | 8.26 (2.53)          |
| G/G + G/A                     | 10 | 10669.33 (4845.16)                      | 1222.40 (419.29)                      | 3.39 (0.97)          | 9.50 (1.77)          |
| <b>ABCG2 rs2231142</b>        |    |                                         |                                       |                      |                      |
| NM                            | 18 | 11534.59 (4616.63)                      | 1400.01 (445.57)                      | 3.34 (0.82)          | 8.95 (2.52)          |
| IM                            | 7  | 10715.86 (4536.14)                      | 1329.92 (565.68)                      | 3.77 (1.09)          | 8.26 (1.66)          |
| <b>CYP2A6</b>                 |    |                                         |                                       |                      |                      |
| *1/*1                         | 22 | 11108.26 (4627.28)                      | 1379.24 (483.78)                      | 3.51 (0.93)          | 8.61 (2.36)          |
| *1/*9                         | 3  | 12750.69 (4024.65)                      | 1388.72 (449.88)                      | 3.04 (0.71)          | 9.81 (1.77)          |
| <b>CYP2B6</b>                 |    |                                         |                                       |                      |                      |
| RM                            | 6  | 12201.51 (3059.67)                      | 1533.82 (295.22)                      | 3.59 (1.05)          | 7.66 (1.22)          |
| NM                            | 6  | 10269.17 (4302.27)                      | 1214.73 (408.50)                      | 4.00 (0.73)          | 8.22 (1.60)          |
| IM                            | 9  | 11613.57 (5744.72)                      | 1384.08 (591.58)                      | 3.16 (0.97)          | 9.47 (2.51)          |
| PM                            | 3  | 12948.58 (3038.92)                      | 1618.05 (400.94)                      | 3.34 (0.32)          | 10.33 (4.10)         |
| <b>CYP2C8</b>                 |    |                                         |                                       |                      |                      |
| RM                            | 6  | 10392.32 (5530.99)                      | 1203.76 (455.16)                      | 2.80 (0.68)          | 8.99 (1.40)          |
| NM                            | 16 | 12030.36 (3954.15)                      | 1471.71 (466.25)                      | 3.71 (0.90)          | 9.04 (2.61)          |
| IM                            | 2  | 5787.45 (1918.53)                       | 948.69 (341.29)                       | 3.32 (1.15)          | 6.55 (1.31)          |
| <b>CYP2C9</b>                 |    |                                         |                                       |                      |                      |
| NM                            | 15 | 10534.71 (3659.84)                      | 1347.78 (433.15)                      | 3.60 (0.79)          | 8.57 (2.69)          |
| PM + IM                       | 10 | 12461.30 (5571.47)                      | 1429.29 (542.96)                      | 3.25 (1.06)          | 9.03 (1.65)          |
| <b>SLC22A1 rs72552763</b>     |    |                                         |                                       |                      |                      |
| GAT/GAT                       | 15 | 10877.91 (4572.82)                      | 1319.24 (437.64)                      | 3.46 (0.83)          | 8.31 (1.71)          |
| GAT/delGAT +<br>delGAT/delGAT | 10 | 11946.50 (4589.39)                      | 1472.09 (526.86)                      | 3.45 (1.05)          | 9.43 (2.96)          |
| <b>SLC22A1 rs12208357</b>     |    |                                         |                                       |                      |                      |
| C/C                           | 22 | 10999.14 (4651.83)                      | 1341.92 (481.45)                      | 3.47 (0.92)          | 8.89 (2.36)          |
| C/T                           | 3  | 13550.91 (2961.76)                      | 1662.41 (300.82)                      | 3.34 (0.97)          | 7.76 (1.79)          |
| <b>SLCO1B1</b>                |    |                                         |                                       |                      |                      |
| NF                            | 21 | 10583.92 (4341.31)                      | 1309.98 (481.01)                      | 3.47 (0.95)          | 9.01 (2.33)          |
| PF + DF                       | 4  | 15092.84 (3825.96)                      | 1749.98 (118.10)                      | 3.38 (0.69)          | 7.41 (1.81)          |
| <b>UGT1A1</b>                 |    |                                         |                                       |                      |                      |
| NF                            | 10 | 10171.38 (4565.93)                      | 1268.86 (454.36)                      | 3.70 (0.99)          | 8.99 (2.77)          |
| PF + DF                       | 15 | 12061.33 (4472.96)                      | 1454.73 (482.15)                      | 3.29 (0.84)          | 8.60 (2.02)          |
| <b>Total</b>                  | 26 | 11230.61 (4439.80)                      | 1382.38 (461.41)                      | 3.51 (0.92)          | 8.71 (2.27)          |

Data shown as mean (standard deviation). AUC<sub>∞</sub>/DW: dose-weight corrected area under the curve. C<sub>max</sub>/DW: dose-weight corrected maximum plasmatic concentration. t<sub>1/2</sub>: half-life. CT: clinical trial. RM: rapid metabolizer. NM: normal metabolizer. IM: intermediate metabolizer. PM: poor metabolizer. NF: normal function. DF: decreased function. PF: poor function. <sup>#</sup>: individuals who self-reported as Latin-American or African.

**Table S3.** Olmesartan pharmacokinetics regarding sex, biogeographic origin, genotypes and phenotypes.

| Variable                    | n  | AUC <sub>∞</sub> /DW<br>(ng*h*kg/ml*mg) | C <sub>max</sub> /DW<br>(ng*kg/ml*mg) | t <sub>max</sub> (h) | t <sub>1/2</sub> (h) |
|-----------------------------|----|-----------------------------------------|---------------------------------------|----------------------|----------------------|
| <b>Biogeographic origin</b> |    |                                         |                                       |                      |                      |
| European                    | 25 | 10910.12 (3027.80)                      | 1448.44 (450.12)                      | 2.62 (0.99)          | 9.06 (1.33)          |
| Other <sup>#</sup>          | 12 | 10723.00 (3458.54)                      | 1359.04 (348.72)                      | 2.79 (1.16)          | 8.94 (1.48)          |
| <b>ABCB1 rs1128503</b>      |    |                                         |                                       |                      |                      |
| T/T                         | 12 | 12055.78 (4236.02)                      | 1514.44 (550.57)                      | 2.67 (1.09)          | 9.40 (1.25)          |
| C/T                         | 12 | 9749.10 (2215.46)                       | 1315.71 (299.95)                      | 2.33 (0.96)          | 9.00 (1.63)          |
| C/C                         | 13 | 10751.57 (2387.33)                      | 1427.51 (376.70)                      | 3.00 (1.02)          | 8.69 (1.18)          |
| <b>ABCB1 rs1045642</b>      |    |                                         |                                       |                      |                      |
| T/T                         | 12 | 11939.94 (4002.88)                      | 1476.99 (543.19)                      | 2.71 (1.16)          | 9.62 (1.16)          |
| C/T                         | 14 | 10298.28 (2831.47)                      | 1434.90 (370.53)                      | 2.36 (0.82)          | 8.91 (1.53)          |
| C/C                         | 11 | 10361.26 (2241.86)                      | 1337.00 (334.20)                      | 3.05 (1.11)          | 8.50 (1.18)          |
| <b>ABCB1 rs2032582</b>      |    |                                         |                                       |                      |                      |
| T/T                         | 9  | 11488.21 (3843.76)                      | 1444.19 (585.37)                      | 2.83 (1.23)          | 9.75 (1.12)          |
| T/G                         | 11 | 10349.10 (2629.67)                      | 1394.23 (334.38)                      | 2.41 (0.97)          | 8.99 (1.46)          |
| G/G + A/A                   | 15 | 10466.73 (2395.79)                      | 1393.25 (360.68)                      | 2.87 (1.03)          | 8.64 (1.40)          |
| <b>ABCC2 rs2273697</b>      |    |                                         |                                       |                      |                      |
| G/G                         | 28 | 10855.95 (3439.86)                      | 1430.50 (448.96)                      | 2.54 (1.08)          | 9.07 (1.42)          |
| G/G + G/A                   | 8  | 10838.89 (2151.04)                      | 1384.80 (339.92)                      | 3.06 (0.82)          | 8.99 (1.23)          |
| <b>ABCG2 rs2231142</b>      |    |                                         |                                       |                      |                      |
| NM                          | 28 | 10829.51 (2936.36)                      | 1430.42 (403.54)                      | 2.57 (1.06)          | 9.15 (1.42)          |
| IM                          | 9  | 10911.42 (3857.40)                      | 1385.29 (481.47)                      | 3.00 (0.94)          | 8.60 (1.11)          |
| <b>SLC22A1 rs72552763</b>   |    |                                         |                                       |                      |                      |
| GAT/GAT                     | 25 | 11212.22 (3325.80)                      | 1474.58 (414.88)                      | 2.82 (0.98)          | 8.99 (1.41)          |
| GAT/-                       | 12 | 10093.62 (2633.25)                      | 1304.58 (415.58)                      | 2.38 (1.13)          | 9.08 (1.30)          |
| <b>SLC22A1 rs34059508</b>   |    |                                         |                                       |                      |                      |
| G/G                         | 35 | 10737.38 (3107.81)                      | 1396.54 (390.85)                      | 2.74 (1.02)          | 9.01 (1.36)          |
| G/A                         | 2  | 12810.46 (3919.36)                      | 1820.21 (855.32)                      | 1.50 (0.00)          | 9.23 (1.97)          |
| <b>SLCO1B1</b>              |    |                                         |                                       |                      |                      |
| NF                          | 30 | 10440.45 (2858.62)                      | 1358.67 (374.76)                      | 2.80 (1.04)          | 9.10 (1.28)          |
| PF + DF                     | 7  | 12602.21 (3837.92)                      | 1679.92 (517.46)                      | 2.14 (0.90)          | 8.67 (1.72)          |
| <b>Total</b>                | 37 | 10849.43 (3126.42)                      | 1419.44 (417.17)                      | 2.68 (1.04)          | 9.02 (1.36)          |

Data shown as mean (standard deviation). AUC<sub>∞</sub>/DW: dose-weight corrected area under the curve. C<sub>max</sub>/DW: dose-weight corrected maximum plasmatic concentration. t<sub>1/2</sub>: half-life. NF: normal function. DF: decreased function. PF: poor function. <sup>#</sup>: individuals who self-reported as Latin-American or African.
